# Supplementary material for: The effect of annealing in carbon powders on the anisotropy of the thermoelectric properties of SrTiO3−δ single crystals on the (001) crystal plane
Source: Royal Society of Chemistry journal article supplement (doi:10.1039/d2ce00423b), 2022-01-01
Supplement: d2ce00423b1.pdf [file d2ce00423b1.pdf]

## Supplementary information

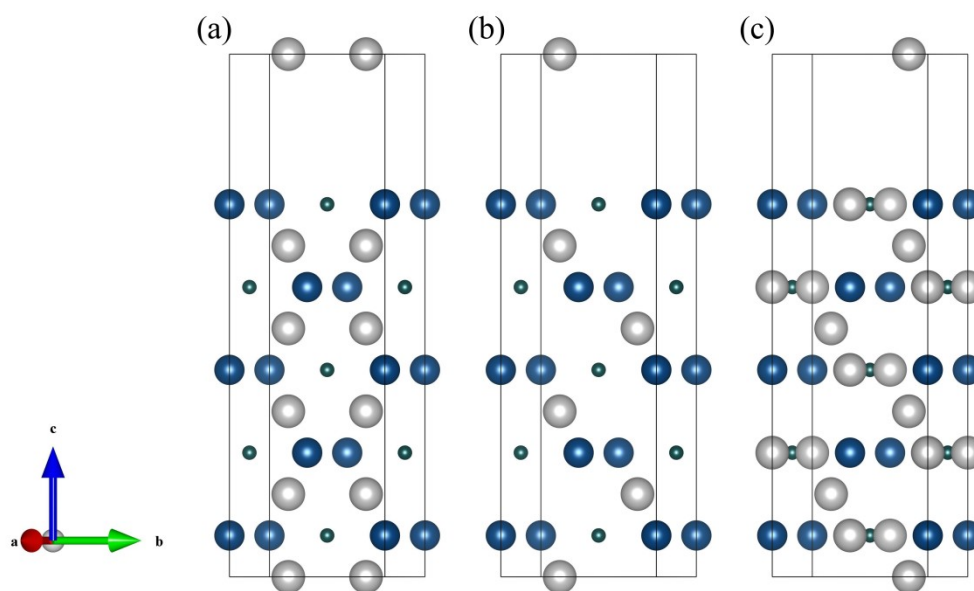

Fig.1 The three models of  $\text{SrTiO}_{3-\delta}$  in  $[110]$  direction (a)  $\text{SrTiO}_{3-\delta-1}$ , (b)  $\text{SrTiO}_{3-\delta-2}$ , (c)  $\text{SrTiO}_{3-\delta-3}$

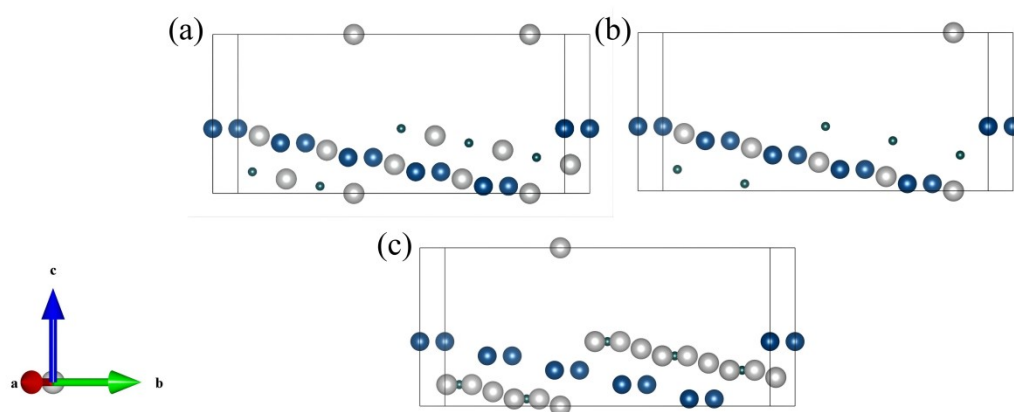

Fig.2 The three models of  $\text{SrTiO}_{3-\delta}$  in  $[510]$  direction (a)  $\text{SrTiO}_{3-\delta-1}$ , (b)  $\text{SrTiO}_{3-\delta-2}$ , (c)  $\text{SrTiO}_{3-\delta-3}$

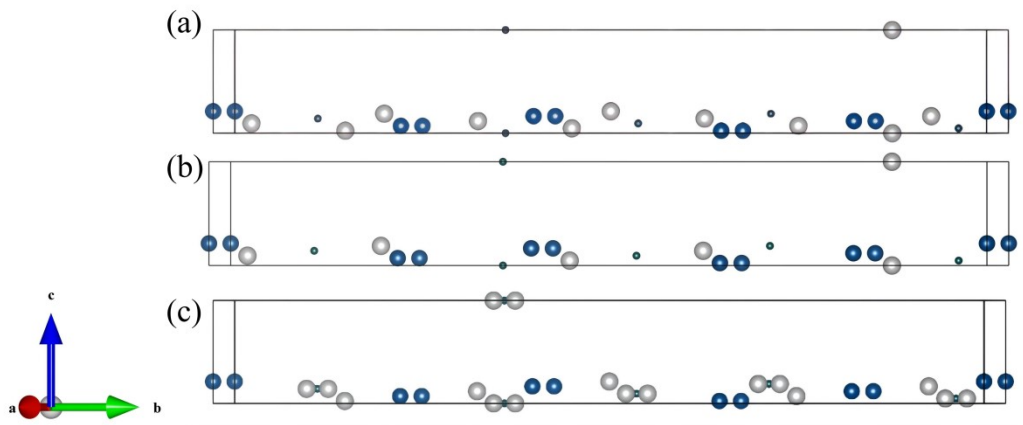

Fig.3 The three models of  $\text{SrTiO}_{3-\delta}$  in  $[12\ 5\ 0]$  direction (a)  $\text{SrTiO}_{3-\delta-1}$ , (b)  $\text{SrTiO}_{3-\delta-2}$ , (c)  $\text{SrTiO}_{3-\delta-3}$

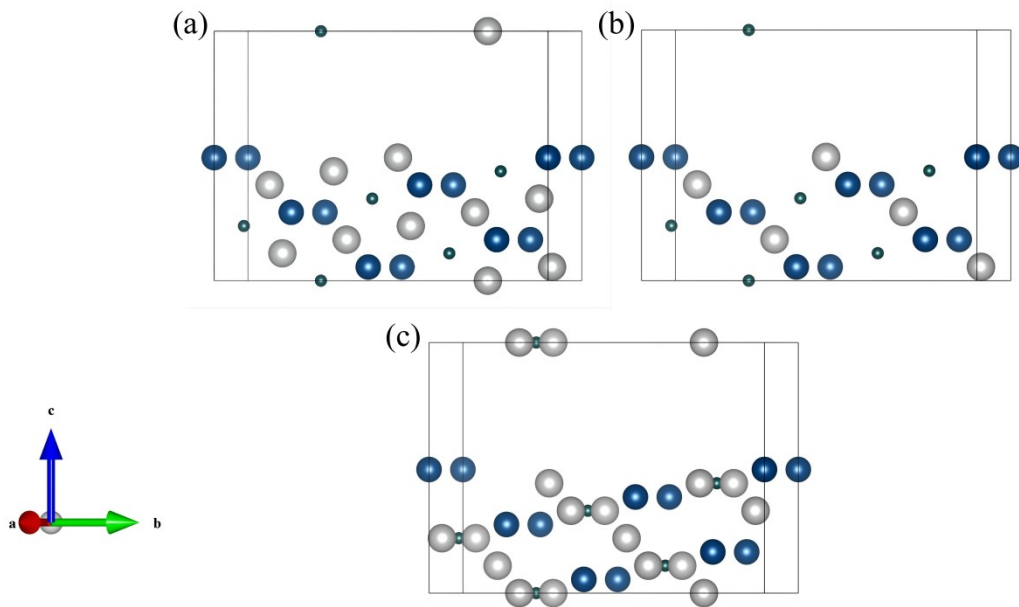

Fig.4 The three models of  $\text{SrTiO}_{3-\delta}$  in  $[320]$  direction (a)  $\text{SrTiO}_{3-\delta-1}$ , (b)  $\text{SrTiO}_{3-\delta-2}$ , (c)  $\text{SrTiO}_{3-\delta-3}$

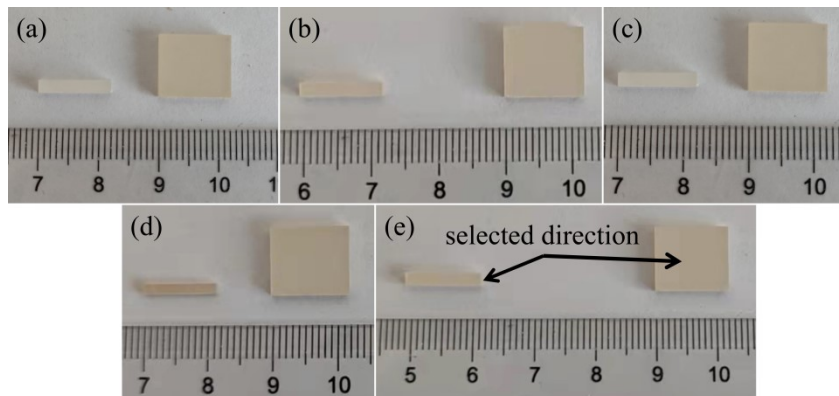

Fig.5 The real image of the  $\text{SrTiO}_{3-\delta}$  samples in different crystal orientations after directional cutting. (a)  $[100]$ , (b)  $[110]$ , (c)  $[510]$ , (d)  $[12\ 5\ 0]$  and (e)  $[320]$ .
